# Supplementary material for: Solving the problem of high concentration aniline inhibiting nitrogen removal: starting the SBBR with the prolonged aeration mode
Source: Royal Society of Chemistry journal article supplement (doi:10.1039/d2ew00808d), 2023-01-01
Supplement: d2ew00808d1.pdf [file d2ew00808d1.pdf]

Supplementary data for

**Solve the problem of high concentration aniline inhibiting nitrogen  
removal: start the SBBR with the prolonged aeration mode**

Bing Lin<sup>a</sup>, Qian Zhang<sup>a, b, \*</sup>, Junhao Su<sup>a</sup>, Meng Li<sup>a, b</sup>, Yunjie Zhang<sup>a</sup>, Jing He<sup>a</sup>,  
Nanping Wu<sup>a</sup>, Xiangyu Liu<sup>a</sup>, Hua Wei<sup>a</sup>

a. School of Civil Engineering & Architecture, Wuhan University of Technology,  
Wuhan 430070, P.R. China

b. Sanya Science and Education Innovation Park, Wuhan University of Technology,  
Hainan 572024, China

Table S1 The change of aniline and  $\text{NH}_4^+\text{-N}$  removal rate ( $\text{mg}\cdot\text{L}^{-1}\cdot\text{H}^{-1}$ ) in SBBR during stage one

| Time (h)                 | 0-1    | 1-2    | 2-3   | 3-4  | 4-5  | 5-6  | 6-7  | 7-8  | 8-9  | 9-10 | 10-11 | 11-22 |
|--------------------------|--------|--------|-------|------|------|------|------|------|------|------|-------|-------|
| Aniline                  | 110.00 | 152.53 | 31.19 | 1.42 | 0.00 | 0.00 | 0.00 | 0.00 | 0.00 | 0.00 | 0.00  | 0.00  |
| $\text{NH}_4^+\text{-N}$ | -14.53 | -14.24 | 1.61  | 3.96 | 4.40 | 3.82 | 3.23 | 3.38 | 1.91 | 1.17 | 1.17  | 0.00  |

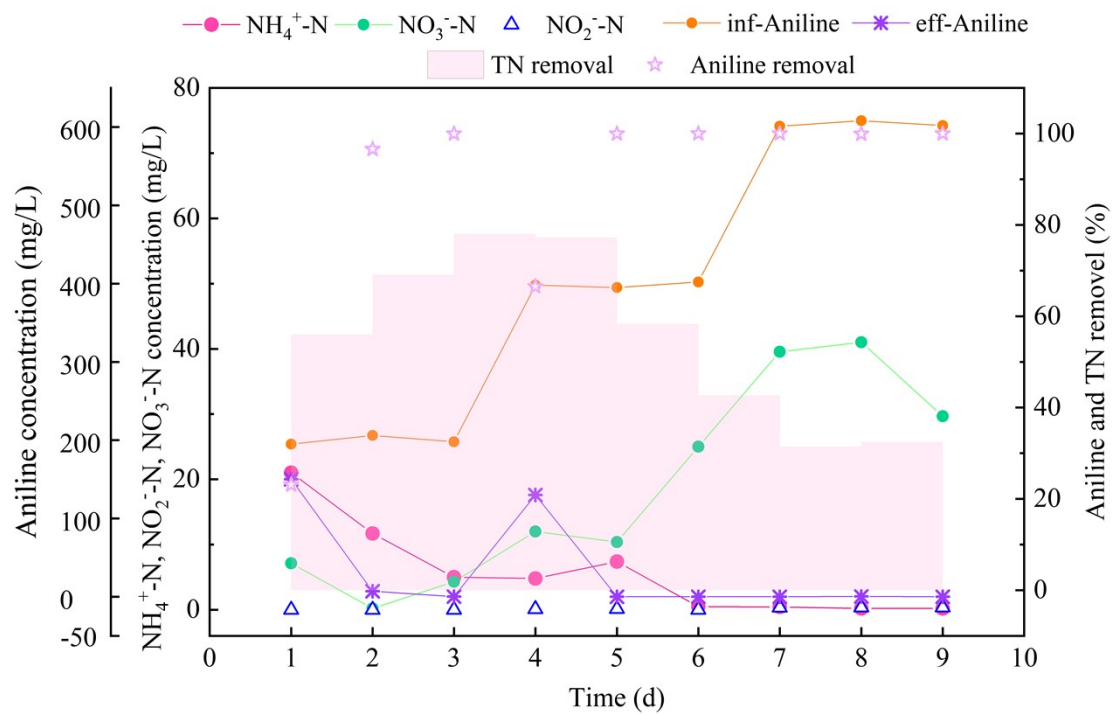

Fig. S1 Sludge acclimation with different aniline concentration gradient starting method
