# Supplementary material for: Solving the problem of high concentration aniline inhibiting nitrogen removal: starting the SBBR with the prolonged aeration mode
Source: Royal Society of Chemistry journal article supplement (doi:10.1039/d2ew00808d), 2023-01-01
Supplement: d2ew00808d2.pdf [file d2ew00808d2.pdf]

Table S1 The change of aniline and  $\text{NH}_4^+\text{-N}$  removal rate ( $\text{mg}\cdot\text{L}^{-1}\cdot\text{h}^{-1}$ ) in SBBR during stage

|                          | one    |        |       |      |      |      |      |      |      |      |       |       |
|--------------------------|--------|--------|-------|------|------|------|------|------|------|------|-------|-------|
| Time (h)                 | 0-1    | 1-2    | 2-3   | 3-4  | 4-5  | 5-6  | 6-7  | 7-8  | 8-9  | 9-10 | 10-11 | 11-22 |
| Aniline                  | 110.00 | 152.53 | 31.19 | 1.42 | 0.00 | 0.00 | 0.00 | 0.00 | 0.00 | 0.00 | 0.00  | 0.00  |
| $\text{NH}_4^+\text{-N}$ | -14.53 | -14.24 | 1.61  | 3.96 | 4.40 | 3.82 | 3.23 | 3.38 | 1.91 | 1.17 | 1.17  | 0.00  |
